# Supplementary material
Source: publisher site journal article supplement (https://www.dovepress.com/article/295320)
Supplement: Supplementary file 1 [file get_supplementary_file.php]

ORIGINAL RESEARCH

Shuyi Qin et al

# Quantitative CT analysis of small airway remodeling in patients with chronic obstructive pulmonary disease by a new image post-processing system

**Table S1** CT results of small airway parameters

|  | Normal  （n = 7） | SAD  (n = 7) | GOLD Ⅰ  (n = 7) | GOLD Ⅱ  (n = 8) | GOLD Ⅲ＋Ⅳ  (n = 9) |
| --- | --- | --- | --- | --- | --- |
| 3-LB1 |  |  |  |  |  |
| WA (mm2) | 25.76 ± 3.87 | 32.28 ± 7.20 | 34.51 ± 16.63 | 34.15 ± 9.67 | 38.10 ± 7.37 |
| LA (mm2) | 15.75 ± 5.21 | 23.22 ± 11.94 | 22.13 ± 10.44 | 17.88 ± 5.16 | 19.31 ± 8.20 |
| AA (mm2) | 41.51 ± 8.28 | 55.45 ± 16.74 | 56.63 ± 25.11 | 52.06 ± 8.31 | 57.40± 9.37 |
| WA/AA (%) | 63.01 ± 7.11 | 59.60 ± 9.82 | 60.63 ± 8.52 | 64.92 ± 10.98 | 66.99 ± 11.85 |
| LA/AA (%) | 36.99 ± 7.11 | 40.49 ± 9.79 | 39.37 ± 8.50 | 34.99 ± 10.94 | 33.03 ± 11.84 |
| 3-LB4 |  |  |  |  |  |
| WA (mm2) | 23.30 ± 12.78 | 16.05 ± 9.07 | 26.51 ± 10.65 | 32.01 ± 14.32 | 33.48 ± 15.09 |
| LA (mm2) | 16.64 ± 8.37 | 13.62 ± 5.22 | 11.34 ± 5.79 | 19.90 ± 9.43 | 16.09 ± 6.61 |
| AA (mm2) | 39.93 ± 20.77 | 29.63 ± 14.10 | 37.84 ± 14.78 | 51.9 ± 19.27 | 49.57 ± 18.98 |
| WA/AA (%) | 57.08 ± 8.10 | 50.72 ± 9.60 | 70.26 ± 7.84 | 60.43 ± 11.26 | 65.66 ± 9.89 |
| LA/AA (%) | 42.93 ± 8.10 | 49.4 ± 9.56 | 29.82 ± 7.93 | 39.69 ± 11.33 | 34.33 ± 9.95 |
| 3-LB6 |  |  |  |  |  |
| WA (mm2) | 36.78 ± 10.59 | 36.45 ± 14.46 | 31.77 ± 11.12 | 55.90 ± 15.29 | 35.83 ± 21.88 |
| LA (mm2) | 27.03 ± 12.99 | 31.68 ± 9.61 | 30.03 ± 15.72 | 33.80 ± 9.63 | 21.36 ± 10.35 |
| AA (mm2) | 63.80 ± 21.04 | 68.12 ± 16.71 | 61.79 ± 16.03 | 89.69 ± 18.50 | 57.20 ± 29.08 |
| WA/AA (%) | 58.63 ± 9.16 | 52.70 ± 10.89 | 53.23 ± 16.98 | 62.12 ± 8.16 | 60.76 ± 12.04 |
| LA/AA (%) | 41.37 ± 9.16 | 47.33 ± 10.91 | 46.79 ± 17.03 | 37.90 ± 8.16 | 39.23 ± 12.05 |
| 3-LB9 |  |  |  |  |  |
| WA (mm2) | 23.98 ± 10.06 | 28.97 ± 4.66 | 28.39 ± 12.69 | 36.13 ± 12.96 | 29.56 ± 9.72 |
| LA (mm2) | 16.95 ± 4.71 | 21.80 ± 6.46 | 15.49 ± 9.03 | 19.00 ± 11.51 | 16.12 ± 6.26 |
| AA (mm2) | 40.91 ± 14.16 | 50.77 ± 9.34 | 43.89 ± 21.2 | 55.14 ± 23.61 | 45.66 ± 14.27 |
| WA/AA (%) | 57.08 ± 7.85 | 57.49 ± 6.31 | 65.56 ± 5.40 | 66.96 ± 7.80 | 65.03 ± 6.80 |
| LA/AA (%) | 42.98 ± 7.99 | 42.49 ± 6.34 | 34.4 ± 5.38 | 33.03 ± 7.75 | 35.01 ± 6.80 |
| 3-RB1 |  |  |  |  |  |
| WA (mm2) | 28.66 ± 9.52 | 28.55 ± 13.37 | 33.89 ± 19.61 | 39.48 ± 12.24 | 36.11 ± 18.63 |
| LA (mm2) | 20.34 ± 5.35 | 18.57 ± 5.02 | 21.59 ± 16.13 | 19.61 ± 9.95 | 15.92 ± 7.26 |
| AA (mm2) | 49.01 ± 13.61 | 47.08 ± 17.48 | 55.47 ± 33.37 | 59.09 ± 21.41 | 52.06 ± 24.05 |
| WA/AA (%) | 58.05 ± 6.48 | 58.96 ± 9.54 | 63.00 ± 10.87 | 67.60 ± 5.33 | 68.48 ± 9.51 |
| LA/AA (%) | 41.92 ± 6.50 | 41.12 ± 9.64 | 37.00 ± 10.87 | 32.41 ± 5.30 | 31.49 ± 9.55 |
| 3-RB4 |  |  |  |  |  |
| WA (mm2) | 30.60 ± 14.62 | 25.02 ± 7.48 | 20.63 ± 3.75 | 42.41 ± 11.45 | 32.16 ± 8.16 |
| LA (mm2) | 21.61 ± 10.27 | 17.08 ± 5.00 | 10.87 ± 4.62 | 19.86 ± 7.48 | 20.01 ± 4.99 |
| AA (mm2) | 52.23 ± 23.51 | 42.12 ± 10.92 | 31.46 ± 7.36 | 62.26 ± 15.24 | 52.19 ± 9.59 |
| WA/AA (%) | 58.08 ± 8.13 | 58.99 ± 6.95 | 66.66 ± 8.47 | 68.45 ± 8.17 | 61.39 ± 8.27 |
| LA/AA (%) | 41.90 ± 8.12 | 40.97 ± 7.03 | 33.49 ± 8.4 | 31.57 ± 8.16 | 38.57 ± 8.29 |
| 3-RB6 |  |  |  |  |  |
| WA (mm2) | 31.23 ± 18.19 | 31.18 ± 9.60 | 41.64 ± 15.50 | 44.56 ± 12.39 | 39.12 ± 16.61 |
| LA (mm2) | 22.56 ± 6.40 | 23.48 ± 10.71 | 24.03 ± 12.20 | 26.23 ± 10.18 | 15.62 ± 7.22 |
| AA (mm2) | 53.81 ± 20.70 | 54.65 ± 18.66 | 65.67 ± 26.67 | 70.80 ± 12.93 | 54.72 ± 22.68 |
| WA/AA (%) | 52.37 ± 21.28 | 58.57 ± 9.16 | 64.30 ± 5.68 | 62.90 ± 12.76 | 71.43 ± 7.20 |
| LA/AA (%) | 47.58 ± 21.31 | 41.46 ± 9.19 | 35.70 ± 5.68 | 37.08 ± 12.79 | 28.61 ± 7.18 |
| 3-RB9 |  |  |  |  |  |
| WA (mm2) | 20.88 ± 6.77 | 24.13 ± 5.36 | 20.73 ± 6.54 | 34.59 ± 10.83 | 32.11 ± 12.04 |
| LA (mm2) | 13.64 ± 5.24 | 14.20 ± 6.47 | 12.87 ± 5.20 | 13.94 ± 7.07 | 17.30 ± 6.67 |
| AA (mm2) | 34.50 ± 11.44 | 38.28 ± 10.76 | 33.59 ± 10.71 | 48.51 ± 15.52 | 49.40 ± 15.86 |
| WA/AA (%) | 60.58 ± 6.10 | 64.00 ± 8.72 | 61.89 ± 8.76 | 71.83 ± 7.47 | 64.22 ± 9.47 |
| LA/AA (%) | 39.43 ± 6.01 | 36.15 ± 8.78 | 38.15 ± 8.78 | 28.25 ± 7.45 | 35.80 ± 9.50 |
| 5-LB1 |  |  |  |  |  |
| WA (mm2) | 11.13 ± 5.51 | 14.98 ± 8.04 | 17.16 ± 6.32 | 17.13 ± 5.76 | 16.99 ± 8.99 |
| LA (mm2) | 7.39 ± 2.51 | 9.22 ± 4.01 | 9.90 ± 4.17 | 6.98 ± 1.45 | 6.51 ± 2.43 |
| AA (mm2) | 18.56 ± 7.05 | 25.55 ± 7.71 | 27.11 ± 8.37 | 24.06 ± 4.73 | 23.49 ± 10.20 |
| WA/AA (%) | 58.19 ± 13.64 | 55.01 ± 18.87 | 62.63 ± 9.68 | 69.54 ± 11.13 | 71.21 ± 8.99 |
| LA/AA (%) | 41.50 ± 13.35 | 36.64 ± 11.28 | 37.10 ± 9.48 | 30.60 ± 11.08 | 28.86 ± 8.89 |
| 5-LB4 |  |  |  |  |  |
| WA (mm2) | 8.53 ± 5.68 | 8.32 ± 2.66 | 15.3 ± 5.88 | 14.45 ± 5.17 | 12.27 ± 9.18 |
| LA (mm2) | 7.68 ± 4.04 | 7.45 ± 2.53 | 7.54 ± 2.42 | 6.91 ± 1.02 | 5.51 ± 2.14 |
| AA (mm2) | 16.23 ± 9.00 | 15.78 ± 3.77 | 22.84 ± 6.98 | 21.38 ± 4.76 | 17.78 ± 10.18 |
| WA/AA (%) | 51.72 ± 10.45 | 52.81 ± 13.22 | 65.15 ± 9.85 | 65.95 ± 10.43 | 63.75 ± 16.37 |
| LA/AA (%) | 48.12 ± 10.5 | 47.09 ± 13.22 | 34.85 ± 9.85 | 33.99 ± 10.44 | 36.27 ± 16.42 |
| 5-LB6 |  |  |  |  |  |
| WA (mm2) | 11.96 ± 7.00 | 14.1 ± 7.53 | 21.46 ± 10.92 | 15.21 ± 4.84 | 17.89 ± 9.66 |
| LA (mm2) | 7.98 ± 2.61 | 8.57 ± 4.07 | 8.90 ± 2.40 | 7.18 ± 2.39 | 7.64 ± 3.98 |
| AA (mm2) | 19.95 ± 9.36 | 22.65 ± 10.07 | 30.36 ± 11.89 | 22.38 ± 5.53 | 25.53 ± 12.32 |
| WA/AA (%) | 57.76 ± 7.13 | 59.54 ± 13.17 | 67.22 ± 11.43 | 67.64 ± 9.64 | 70.01 ± 9.54 |
| LA/AA (%) | 42.25 ± 7.31 | 40.5 ± 13.17 | 32.77 ± 11.43 | 32.43 ± 9.66 | 29.99 ± 9.54 |
| 5-LB9 |  |  |  |  |  |
| WA (mm2) | 11.60 ± 8.99 | 17.68 ± 5.78 | 19.96 ± 5.98 | 16.08 ± 5.51 | 15.84 ± 8.90 |
| LA (mm2) | 10.35 ± 5.04 | 13.90 ± 6.01 | 10.36 ± 1.74 | 10.48 ± 1.82 | 6.64 ± 2.47 |
| AA (mm2) | 21.96 ± 13.68 | 31.6 ± 10.33 | 30.33 ± 5.23 | 26.58 ± 5.23 | 22.50 ± 10.40 |
| WA/AA (%) | 48.40 ± 11.75 | 56.52 ± 9.42 | 64.69 ± 10.30 | 59.09 ± 10.14 | 67.60 ± 7.98 |
| LA/AA (%) | 51.59 ± 12.04 | 43.44 ± 9.44 | 35.27 ± 10.32 | 40.81 ± 10.23 | 32.14 ± 9.38 |
| 5-RB1 |  |  |  |  |  |
| WA (mm2) | 8.58 ± 2.36 | 11.32 ± 8.93 | 12.71 ± 5.23 | 13.90 ± 6.63 | 16.13 ± 8.05 |
| LA (mm2) | 7.06 ± 2.93 | 7.97 ± 4.60 | 8.36 ± 4.95 | 23.61 ± 49.89 | 4.41 ± 1.88 |
| AA (mm2) | 15.64 ± 4.36 | 19.27 ± 13.22 | 21.07 ± 9.42 | 21.33 ± 5.79 | 20.56 ± 8.94 |
| WA/AA (%) | 56.24 ± 10.55 | 57.25 ± 6.79 | 60.94 ± 9.34 | 71.53 ± 9.21 | 77.07 ± 6.64 |
| LA/AA (%) | 43.80 ± 10.59 | 42.51 ± 7.15 | 39.00 ± 9.29 | 28.59 ± 9.23 | 22.89 ± 6.70 |
| 5-RB4 |  |  |  |  |  |
| WA (mm2) | 11.79 ± 5.75 | 10.80 ± 6.96 | 16.31 ± 5.46 | 16.58 ± 5.37 | 18.26 ± 8.90 |
| LA (mm2) | 9.81 ± 4.67 | 8.40 ± 4.01 | 9.30 ± 4.91 | 8.39 ± 1.22 | 7.91 ± 2.74 |
| AA (mm2) | 21.64 ± 9.66 | 19.27 ± 10.37 | 25.61 ± 10.01 | 24.96 ± 5.86 | 26.14 ± 10.96 |
| WA/AA (%) | 53.87 ± 11.01 | 55.13 ± 7.88 | 64.27 ± 6.30 | 65.26 ± 6.65 | 68.02 ± 8.04 |
| LA/AA (%) | 45.95 ± 11.00 | 44.52 ± 7.91 | 35.70 ± 6.10 | 34.74 ± 6.65 | 32.04 ± 7.98 |
| 5-RB6 |  |  |  |  |  |
| WA (mm2) | 11.71 ± 6.23 | 13.22 ± 5.31 | 19.67 ± 7.6 | 18.33 ± 5.88 | 10.89 ± 2.02 |
| LA (mm2) | 7.78 ± 3.40 | 8.45 ± 4.14 | 7.13 ± 2.28 | 8.63 ± 3.46 | 4.86 ± 2.53 |
| AA (mm2) | 19.49 ± 7.50 | 21.65 ± 5.58 | 26.81 ± 7.76 | 26.93 ± 4.86 | 15.74 ± 3.44 |
| WA/AA (%) | 57.64 ± 16.11 | 60.42 ± 16.11 | 72.01 ± 9.35 | 67.34 ± 13.70 | 70.37 ± 10.75 |
| LA/AA (%) | 42.36 ± 16.11 | 39.64 ± 16.15 | 27.93 ± 9.23 | 32.73 ± 13.62 | 29.62 ± 10.87 |
| 5-RB9 |  |  |  |  |  |
| WA (mm2) | 7.68 ± 5.32 | 8.58 ± 3.42 | 25.06 ± 15.47 | 13.76 ± 4.91 | 20.09 ± 9.21 |
| LA (mm2) | 8.45 ± 3.66 | 7.48 ± 3.36 | 8.80 ± 1.81 | 7.09 ± 2.32 | 10.19 ± 5.49 |
| AA (mm2) | 16.13 ± 7.27 | 16.1 ± 5.92 | 33.90 ± 16.55 | 20.81 ± 6.16 | 30.29 ± 14.20 |
| WA/AA (%) | 45.23 ± 13.7 | 53.77 ± 9.62 | 71.02 ± 8.79 | 65.85 ± 8.63 | 67.1 ± 7.09 |
| LA/AA (%) | 54.82 ± 13.64 | 46.02 ± 9.72 | 28.83 ± 8.74 | 34.28 ± 8.78 | 32.87 ± 6.93 |
| 9-LB1 |  |  |  |  |  |
| WA (mm2) | 6.54 ± 2.94 | 6.23 ± 4.80 | 8.51 ± 4.58 | 8.38 ± 5.19 | 7.97 ± 5.81 |
| LA (mm2) | 5.42 ± 1.49 | 4.56 ± 2.91 | 5.37 ± 2.84 | 3.72 ± 1.70 | 3.56 ± 1.97 |
| AA (mm2) | 12.24 ± 3.58 | 11.59 ± 6.98 | 13.91 ± 6.91 | 12.09 ± 6.45 | 11.53 ± 7.27 |
| WA/AA (%) | 47.65 ± 10.90 | 43.67 ± 13.08 | 48.44 ± 15.77 | 49.85 ± 21.05 | 51.17 ± 18.66 |
| LA/AA (%) | 52.29 ± 10.95 | 37.85 ± 13.55 | 34.58 ± 12.12 | 27.38 ± 10.65 | 28.07 ± 11.26 |
| 9-LB4 |  |  |  |  |  |
| WA (mm2) | 5.41 ± 3.18 | 4.43 ± 1.37 | 7.91 ± 3.50 | 7.68 ± 5.00 | 7.17 ± 5.03 |
| LA (mm2) | 5.39 ± 2.30 | 3.92 ± 2.39 | 4.32 ± 1.66 | 3.84 ± 1.88 | 3.35 ± 1.69 |
| AA (mm2) | 10.8 ± 4.65 | 8.36 ± 3.32 | 12.23 ± 4.81 | 11.52 ± 6.43 | 10.52 ± 6.24 |
| WA/AA (%) | 46.97 ± 14.3 | 42.44 ± 11.06 | 50.94 ± 15.26 | 48.47 ± 17.92 | 51.90 ± 18.63 |
| LA/AA (%) | 53.14 ± 14.48 | 40.75 ± 22.52 | 32.27 ± 11.41 | 28.73 ± 15.27 | 27.32 ± 12.21 |
| 9-LB6 |  |  |  |  |  |
| WA (mm2) | 8.89 ± 5.21 | 6.48 ± 4.39 | 11.71 ± 6.68 | 8.23 ± 5.11 | 9.86 ± 8.57 |
| LA (mm2) | 6.53 ± 2.31 | 4.47 ± 2.80 | 4.79 ± 2.14 | 3.65 ± 1.72 | 4.14 ± 2.85 |
| AA (mm2) | 15.41 ± 7.31 | 10.93 ± 6.75 | 16.51 ± 8.35 | 11.88 ± 6.25 | 13.98 ± 11.10 |
| WA/AA (%) | 49.66 ± 8.19 | 44.56 ± 14.45 | 56.31 ± 19.22 | 52.45 ± 22.33 | 54.71 ± 20.19 |
| LA/AA (%) | 50.65 ± 8.31 | 39.05 ± 17.64 | 26.96 ± 8.89 | 24.84 ± 8.82 | 24.68 ± 9.17 |
| 9-LB9 |  |  |  |  |  |
| WA (mm2) | 8.93 ± 6.19 | 7.66 ± 4.11 | 10.58 ± 6.38 | 8.87 ± 5.08 | 8.85 ± 4.99 |
| LA (mm2) | 8.61 ± 4.06 | 6.53 ± 4.28 | 5.81 ± 2.45 | 5.42 ± 2.36 | 4.16 ± 1.84 |
| AA (mm2) | 17.54 ± 10.04 | 14.19 ± 7.94 | 16.38 ± 8.12 | 14.30 ± 6.87 | 13.02 ± 6.37 |
| WA/AA (%) | 40.71 ± 5.90 | 39.66 ± 13.85 | 49.54 ± 20.77 | 46.94 ± 21.65 | 50.22 ± 17.73 |
| LA/AA (%) | 59.58 ± 5.84 | 43.81 ± 18.64 | 33.97 ± 12.59 | 30.34 ± 9.82 | 24.88 ± 9.96 |
| 9-RB1 |  |  |  |  |  |
| WA (mm2) | 5.46 ± 1.56 | 5.54 ± 3.93 | 7.17 ± 3.12 | 7.55 ± 4.28 | 8.73 ± 5.46 |
| LA (mm2) | 5.13 ± 1.94 | 4.09 ± 3.43 | 4.47 ± 2.87 | 9.51 ± 21.30 | 2.49 ± 1.38 |
| AA (mm2) | 10.59 ± 2.96 | 9.61 ± 7.11 | 11.64 ± 5.60 | 10.20 ± 6.25 | 11.23 ± 6.42 |
| WA/AA (%) | 46.08 ± 9.69 | 40.71 ± 13.97 | 47.87 ± 20.05 | 49.91 ± 21.85 | 48.29 ± 16.42 |
| LA/AA (%) | 52.21 ± 11.56 | 37.91 ± 22.54 | 30.89 ± 16.06 | 22.64 ± 11.31 | 19.15 ± 10.36 |
| 9-RB4 |  |  |  |  |  |
| WA (mm2) | 7.63 ± 3.32 | 5.03 ± 3.62 | 8.49 ± 4.44 | 8.35 ± 5.32 | 7.99 ± 5.43 |
| LA (mm2) | 7.71 ± 2.45 | 4.59 ± 2.95 | 5.39 ± 2.53 | 4.41 ± 2.07 | 4.16 ± 2.13 |
| AA (mm2) | 15.36 ± 5.38 | 9.65 ± 6.30 | 13.89 ± 6.73 | 12.77 ± 7.22 | 12.15 ± 7.33 |
| WA/AA (%) | 44.9 ± 10.54 | 40.00 ± 13.98 | 49.17 ± 20.13 | 46.34 ± 19.31 | 44.90 ± 15.88 |
| LA/AA (%) | 54.94 ± 10.54 | 43.06 ± 16.97 | 34.1 ± 8.29 | 30.86 ± 11.76 | 34.19 ± 12.98 |
| 9-RB6 |  |  |  |  |  |
| WA (mm2) | 7.28 ± 3.40 | 5.83 ± 3.67 | 9.57 ± 5.18 | 8.84 ± 5.49 | 5.98 ± 2.77 |
| LA (mm2) | 5.67 ± 2.29 | 4.25 ± 2.89 | 4.13 ± 1.98 | 4.46 ± 2.33 | 3.08 ± 1.66 |
| AA (mm2) | 12.93 ± 4.38 | 10.07 ± 5.34 | 13.7 ± 6.67 | 13.28 ± 7.03 | 9.06 ± 3.91 |
| WA/AA (%) | 51.66 ± 12.9 | 42.91 ± 18.53 | 53.36 ± 17.35 | 50.29 ± 22.91 | 51.02 ± 19.48 |
| LA/AA (%) | 48.63 ± 12.74 | 40.55 ± 20.31 | 30.06 ± 8.85 | 27.14 ± 7.35 | 28.14 ± 11.98 |
| 9-RB9 |  |  |  |  |  |
| WA (mm2) | 5.06 ± 3.20 | 4.70 ± 2.29 | 12.44 ± 8.79 | 7.14 ± 4.31 | 9.68 ± 5.63 |
| LA (mm2) | 6.31 ± 2.15 | 4.23 ± 2.63 | 4.93 ± 2.05 | 3.75 ± 2.04 | 4.85 ± 3.11 |
| AA (mm2) | 11.37 ± 4.04 | 8.94 ± 4.41 | 17.37 ± 10.32 | 10.89 ± 6.05 | 14.54 ± 8.54 |
| WA/AA (%) | 40.71 ± 12.68 | 42.31 ± 11.59 | 55.1 ± 19.47 | 49.72 ± 16.81 | 53.35 ± 17.58 |
| LA/AA (%) | 59.43 ± 12.48 | 41.00 ± 20.90 | 28.41 ± 11.11 | 27.42 ± 11.76 | 25.78 ± 10.25 |
| Emphysema |  |  |  |  |  |
| Emphysema Volume(cc) | 10.13 ± 16.88 | 26.97 ± 22.21 | 142.89 ± 303.54 | 188.60 ± 177.53 | 985.47 ± 1064.91*† |
| Total Volume(cc) | 4123.16 ± 1172.65 | 5280.33 ± 1053.54 | 4790.63 ± 684.07 | 5728.84 ± 1038.73 | 6096.36 ± 1411.18 |
| EI (%) | 0.29 ± 0.54 | 0.56 ± 0.50 | 2.71 ± 5.10 | 3.16 ± 2.94 | 13.85 ± 13.89 |

**Notes:** Data are shown as mean ± SD.

**Abbreviations:** SAD, small airway disease; GOLD, Global Initiative for Chronic Obstructive Pulmonary Disease; EI, emphysema index; WA, wall area; LA, lumen area; AA, airway area, WA/AA, wall area/airway area; LA/AA, lumen area/airway area; B1, apex anterior segment; B4, lingual segment; B6, apex segment; B9, extra basal segment; L left lobe, R right lobe.

**
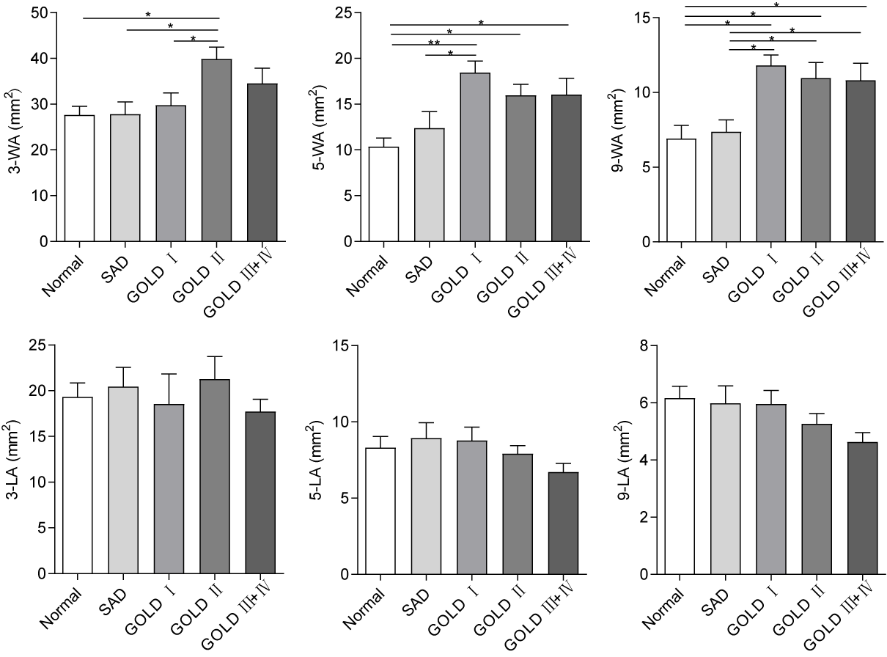
**

**Figure S1** Comparison of WA and LA among different groups.

**Notes:** 3-, 5-, 9- represented the 3rd, 5th, 9th generations respectively. * *P* < 0.05; ** *P* < 0.01.

**Abbreviations:** SAD, small airway disease; GOLD, Global Initiative for Chronic Obstructive Pulmonary Disease; WA wall area, LA lumen area.

*
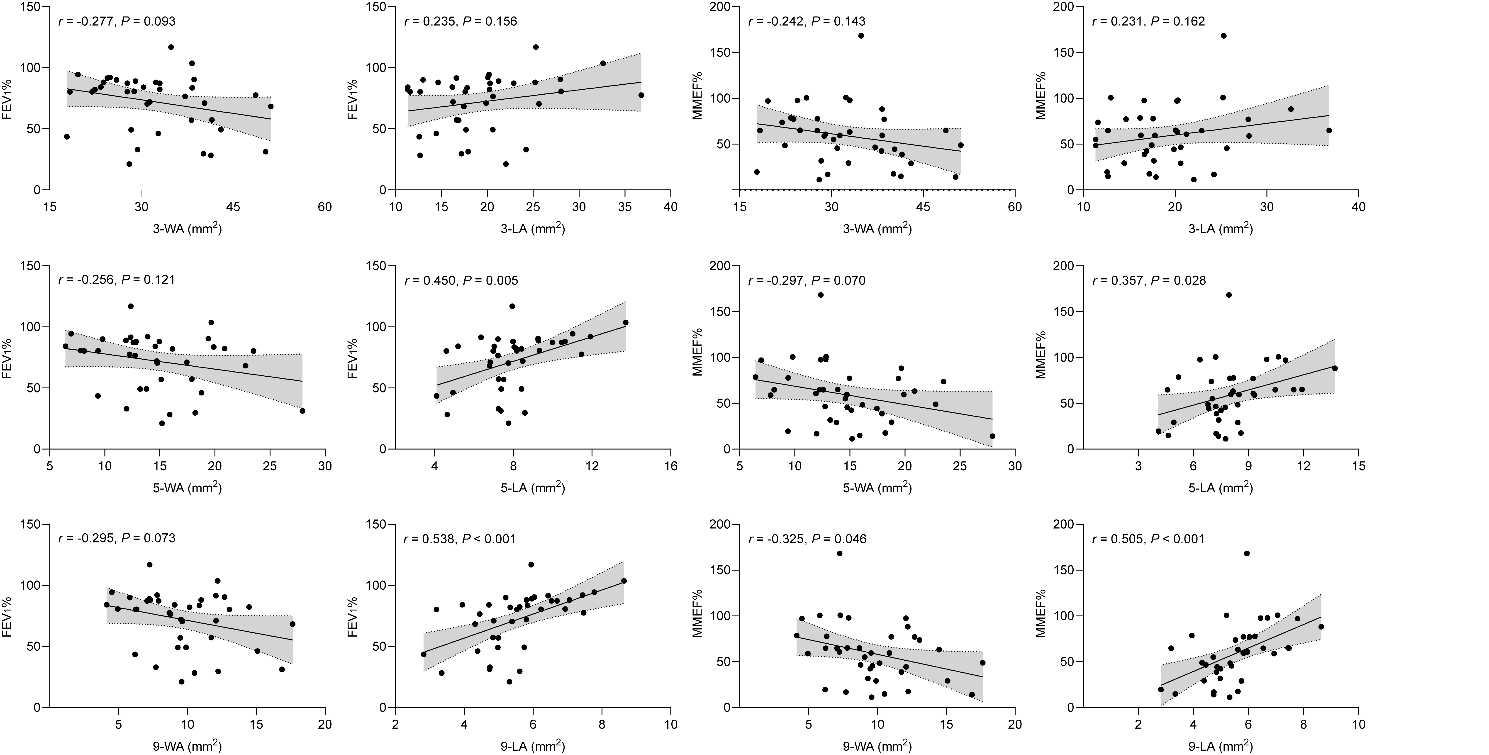
*

**Figure S2** Correlation between airway dimensions and FEV1%, MMEF%.

**Notes:** 3-, 5-, 9- represented the 3rd, 5th, 9th generations respectively.

**Abbreviations:** WA, wall area; LA lumen area; FEV1, Forced expiratory volume in one second; MMEF, maximal mid-expiratory flow.
